# Supplementary material
Source: PubMed Central journal article supplement (PMC3248278)
Supplement: JCI43134sd.pdf [file JCI43134sd.pdf]

**Supplementary Table 1. Body weight and metabolic parameters of HFD fed DIO mice compared to chow fed controls.**

|                         | <b>DIO (N=8)</b> | <b>Control (N=8)</b> | <b>t-test</b> |
|-------------------------|------------------|----------------------|---------------|
| <b>Body weight</b>      | 47.4±0.4g        | 30.8±0.5g            | p=0.0001      |
| <b>Leptin</b>           | 74.0±5.7ng/mL    | 6.7±1.4ng/mL         | p=0.0001      |
| <b>Glucose (fed)</b>    | 207.8±6.8mg/dL   | 184.1±6.6mg/dL       | p=0.0263      |
| <b>Glucose (fasted)</b> | 153.4±10.6mg/dL  | 82.3±4.6mg/dL        | p=0.0098      |
| <b>Insulin (fed)</b>    | 14.3±1.9ng/mL    | 0.5±0.1ng/mL         | p=0.0001      |
| <b>Insulin (fasted)</b> | 2.4±0.2ng/mL     | 0.4±0.1ng/mL         | p=0.0017      |

**Supplementary Table 2. Body weight of continually HFD fed DIO mice compared to chow fed controls and DIO mice after 4 weeks of calorie restriction.**

|                    | <b>DIO<br/>(N=6)</b> | <b>DIO v Chow<br/>t-test</b> | <b>Chow<br/>(N=8)</b> | <b>DIO then CR<br/>(N=5)</b> | <b>Chow v DIO then CR<br/>t-test</b> |
|--------------------|----------------------|------------------------------|-----------------------|------------------------------|--------------------------------------|
| <b>Body weight</b> | 45.3±1.5g            | p=0.0001                     | 34.2±0.6g             | 32.5 ±0.8g                   | p=0.0956                             |
